# Supplementary material
Source: publisher figshare collection journal article supplement (https://asha.figshare.com/articles/dataset/_/23230475)
Supplement: Supplementary file 1 [file 1]

**Supplemental Material S3.** Complete list of verbal card sorting task (VCST) stimuli separated by first letter, number of letters, and semantic category.

|                   |         | First Letter: S   |      |       |        |
|-------------------|---------|-------------------|------|-------|--------|
|                   |         | Number of Letters |      |       |        |
|                   |         | 3                 | 4    | 5     | 6      |
| Semantic Category | Name    | SAM               | SARA | SIMON | SOPHIA |
|                   | Animal  | SOW               | SWAN | SNAKE | SPIDER |
|                   | Food    | SOY               | SALT | SUGAR | SQUASH |
|                   | Nonword | SUT               | SPEA | SUGGY | SPETLE |
|                   |         | First Letter: P   |      |       |        |
| Semantic Category | Name    | PAM               | PAUL | PETER | PAYTON |
|                   | Animal  | PIG               | PUMA | PANDA | PARROT |
|                   | Food    | PIE               | PEAR | PASTA | PAPAYA |
|                   | Nonword | PUM               | POTE | PAROW | PITION |
|                   |         | First Letter: B   |      |       |        |
| Semantic Category | Name    | BEN               | BETH | BRUCE | BONNIE |
|                   | Animal  | BAT               | BEAR | BISON | BEAVER |
|                   | Food    | BUN               | BEAN | BREAD | BUTTER |
|                   | Nonword | BOM               | BRUN | BLEEM | BRASLE |
|                   |         | First Letter: D   |      |       |        |
| Semantic Category | Name    | DAN               | DREW | DIANE | DUSTIN |
|                   | Animal  | DOG               | DEER | DINGO | DONKEY |
|                   | Food    | DIP               | DATE | DONUT | DANISH |
|                   | Nonword | DUT               | DIEN | DREEB | DIKTON |
