# Supplementary material
Source: publisher figshare collection journal article supplement (https://asha.figshare.com/articles/dataset/_/23230475)

**Supplemental Material S2.** Visual depiction of the first trial of the Berg Card Sorting Task (BCST; Panel A) and verbal card sorting task (VCST; Panel B).

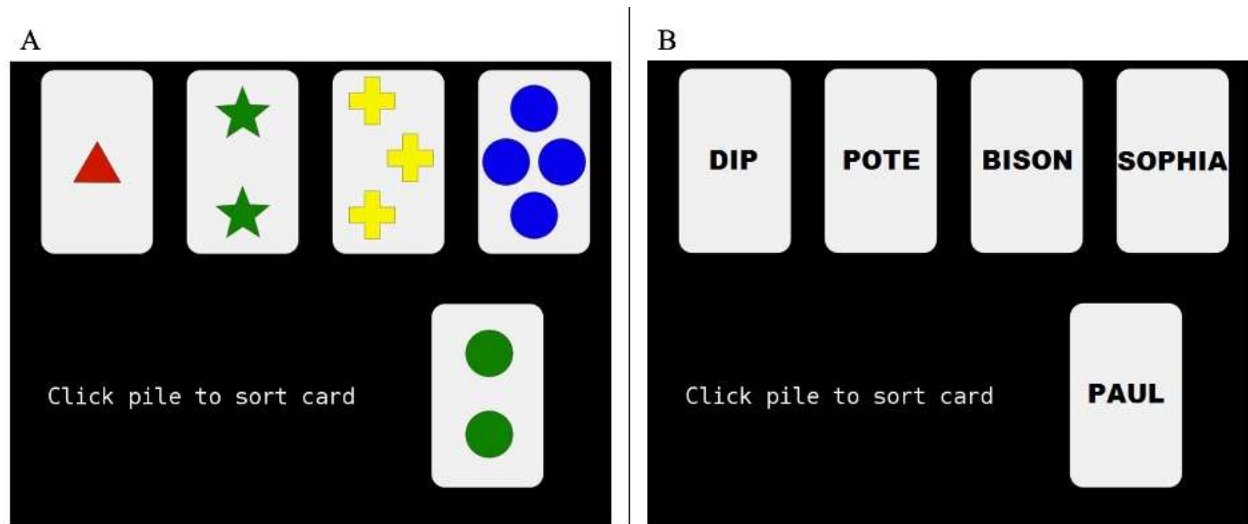

Supplement: Supplementary file 2 [file 1]
