# Supplementary material
Source: publisher figshare collection journal article supplement (https://asha.figshare.com/articles/dataset/_/23230475)
Supplement: Supplementary file 3 [file 1]

**Supplemental Material S1.** Demographic and mild traumatic brain injury (mTBI) specific information for the mTBI group.

| Participant   | Age           | Gen            | Ed            | MoCA          | #mTBI        | TSO            | LOC            |
|---------------|---------------|----------------|---------------|---------------|--------------|----------------|----------------|
| mTBI 1        | 23            | F              | 17            | 26            | 3            | 72             | Y              |
| mTBI 2        | 26            | F              | 19            | 28            | 1            | 132            | Y              |
| mTBI 3        | 22            | M              | 14            | 29            | 1            | 12             | Y              |
| mTBI 4        | 24            | F              | 19            | 30            | 1            | 24             | N              |
| mTBI 5        | 22            | F              | 17            | 30            | 1            | 228            | Y              |
| mTBI 6        | 24            | M              | 17            | 27            | 1            | 132            | Y              |
| mTBI 7        | 28            | M              | 16            | 19            | 1            | 108            | N              |
| mTBI 8        | 33            | M              | 16            | 25            | 1            | 132            | Y              |
| mTBI 9        | 23            | F              | 16            | 28            | 1            | 108            | Y              |
| mTBI 10       | 29            | F              | 17            | 27            | 7            | 1              | Y              |
| mTBI 11       | 27            | M              | 16            | 19            | 1            | 72             | Y              |
| mTBI 12       | 26            | F              | 22            | 28            | 1            | 120            | N              |
| mTBI 13       | 24            | F              | 17            | 30            | 3            | 48             | N              |
| mTBI 14       | 23            | F              | 17            | 27            | 1            | 24             | Y              |
| mTBI 15       | 28            | F              | 15            | 29            | 1            | 12             | N              |
| mTBI 16       | 30            | F              | 18            | 29            | 3            | 108            | Y              |
| mTBI 17       | 26            | M              | 15            | 26            | 2            | 108            | N              |
| mTBI 18       | 27            | M              | 20            | 26            | 4            | 120            | Y              |
| mTBI 19       | 30            | M              | 18            | 25            | 6            | 144            | Y              |
| mTBI 20       | 36            | M              | 19            | 27            | 1            | 132            | N              |
| mTBI 21       | 28            | M              | 16            | 27            | 1            | 144            | N              |
| mTBI 22       | 23            | M              | 18            | 28            | 2            | 17             | N              |
| mTBI 23       | 29            | M              | 17            | 30            | 2            | 120            | Y              |
| mTBI 24       | 26            | M              | 19            | 29            | 1            | 134            | Y              |
| mTBI 25       | 25            | M              | 12            | 27            | 3            | 66             | Y              |
| mTBI 26       | 27            | F              | 18            | 28            | 1            | 84             | Y              |
| mTBI 27       | 25            | M              | 16            | 28            | 1            | 75             | N              |
| mTBI 28       | 33            | M              | 12            | 28            | 2            | 102            | N              |
| mTBI 29       | 31            | M              | 13            | 22            | 1            | 51             | N              |
| mTBI 30       | 34            | M              | 16            | 20            | 2            | 36             | Y              |
| mTBI 31       | 29            | M              | 16            | 28            | 1            | 108            | Y              |
| mTBI 32       | 32            | M              | 15            | 26            | 1            | 48             | N              |
| mTBI 33       | 31            | M              | 12            | 24            | 3            | 36             | Y              |
| mTBI 34       | 36            | M              | 16            | 27            | 2            | 48             | Y              |
| mTBI 35       | 25            | M              | 12            | 25            | 1            | 48             | N              |
| <i>M (SD)</i> | 27.0<br>(3.9) | 0.39<br>(0.50) | 16.6<br>(2.2) | 26.6<br>(3.2) | 1.7<br>(1.4) | 82.1<br>(53.5) | 0.61<br>(0.50) |

*Note.* Gen = gender; Ed = education (years); #mTBI = number of mTBIs; TSO = time since last mTBI (months); LOC = loss of consciousness following mTBI; Y = symptom occurred at time of mTBI; N = symptom did not occur at time of mTBI; averages based on coding Y as 1, N as 0, F as 1, and M as 0.
