# Supplementary material
Source: publisher figshare collection journal article supplement (https://asha.figshare.com/articles/dataset/_/23230475)
Supplement: Supplementary file 4 [file 1]

**Supplemental Material S4.** Nonstandardized means and standard deviations (in parentheses) for each card sorting task measure within each task and group.

| Score                          | mTBI          |               | Control       |              |
|--------------------------------|---------------|---------------|---------------|--------------|
|                                | VCST          | BCST          | VCST          | BCST         |
| <b>Factor 1</b>                |               |               |               |              |
| Total Correct                  | 39.83 (14.70) | 50.23 (5.74)  | 45.45 (9.19)  | 53.12 (2.98) |
| Total Errors                   | 24.17 (14.70) | 13.77 (5.74)  | 18.55 (9.19)  | 10.88 (2.98) |
| Perseverative Errors           | 6.94 (5.82)   | 7.26 (2.21)   | 7.48 (4.29)   | 6.94 (2.12)  |
| Perseverative Responses        | 14.80 (9.04)  | 18.77 (3.24)  | 17.58 (5.62)  | 19.55 (3.18) |
| Conceptual Level Responses (%) | 52.91 (28.46) | 71.70 (11.80) | 61.28 (18.78) | 76.49 (6.97) |
| Categories Completed           | 2.43 (1.58)   | 3.86 (1.00)   | 3.03 (1.24)   | 4.33 (0.69)  |
| <b>Factor 2</b>                |               |               |               |              |
| Failure to Maintain Set        | 0.60 (0.81)   | 0.37 (0.55)   | 0.67 (0.82)   | 0.30 (0.53)  |
| Nonsorted Correct Responses    | 15.54 (6.98)  | 11.66 (5.90)  | 15.15 (7.05)  | 9.79 (5.13)  |
| <b>Factor 3</b>                |               |               |               |              |
| Nonperseverative Errors        | 17.17 (16.86) | 6.51 (5.00)   | 11.06 (8.94)  | 3.94 (2.42)  |
| Unique Errors                  | 4.69 (6.52)   | 1.03 (2.26)   | 1.85 (1.86)   | 0.39 (0.70)  |

*Note.* mTBI = mild traumatic brain injury; VCST = verbal card sorting task; BCST = Berg Card Sorting Task.
